# Supplementary material
Source: publisher figshare collection journal article supplement (https://sage.figshare.com/ndownloader/files/14015954)
Supplement: Supplementary file 1 [file 14015954]

References

[References marked with an asterisk indicate studies included in the meta-analysis..](C:\\Users\\user\\Desktop\\lavanya\\Nov\\9.11.2018\\otp\\TVA815136_ed.docx#HueD_Ref1)

*Alexander, P. C. (1993). The differential effects of abuse characteristics and attachment in the prediction of long-term effects of sexual abuse. *Journal of Interpersonal Violence, 8*, 346–362. doi:10.1177/088626093008003004

*Alexander, P. C., Anderson, C. L., Brand, B., Schaeffer, C. M., Grelling, B. Z., & Kretz, L. (1998). Adult attachment and long-term effects in survivors of incest. *Child Abuse & Neglect, 22*, 45–61. doi:10.1016/S0145-2134(97)00120-8

*An, Y., Yuan, G., Liu, Z., Zhou, Y., & Xu, W. (2018). Dispositional mindfulness mediates the relationships of parental attachment to posttraumatic stress disorder and academic burnout in adolescents following the Yancheng tornado. *European Journal of Psychotraumatology, 9*, 1472989. doi:10.1080/20008198.2018.1472989

*Andersen, T. E., Elklit, A., & Vase, L. (2011). The relationship between chronic whiplash-associated disorder and post-traumatic stress: Attachment-anxiety may be a vulnerability factor. *European Journal of Psychotraumatology, 2*, 5633–5642. doi:10.3402/ejpt.v2i0.5633

*Andersen, T. E., Lahav, Y., Mikulincer, M., & Solomon, Z. (2015). Attachment security and pain—The disrupting effect of captivity and PTSS. *Journal of Psychosomatic Research, 79*, 471–476. doi:10.1016/j.jpsychores.2015.10.008

*Arikan, G., Stopa, L., Carnelley, K. B., & Karl, A. (2016). The associations between adult attachment, posttraumatic symptoms, and posttraumatic growth. *Anxiety, Stress, & Coping*, *29*, 1–20. doi:10.1080/10615806.2015.1009833

*Armour, C., Elklit, A., & Shevlin, M. (2011). Attachment typologies and posttraumatic stress disorder (PTSD), depression and anxiety: A latent profile analysis approach. *European Journal of Psychotraumatology, 2*, 6018. doi:10.3402/ejpt.v2i0.6018

*Ayotte, M., Lanctot, N., & Tourigny, M. (2017). The association between the working alliance with adolescent girls in residential care and their trauma-related symptoms in emerging adulthood. *Child Youth Care Forum, 46*, 601–620. doi:10.1007/s10566-017-9398-x

*Bachem, R., Levin, Y., & Solomon, Z. (2018). Trajectories of attachment in older age: Interpersonal trauma and its consequences. *Attachment & Human Development*, *4*, 1–20. doi:10.1080/14616734.2018.1479871

*Benoit, M., Bouthillier, D., Moss, E., Rousseau, C., & Brunet, A. (2010). Emotion regulation strategies as mediators of the association between level of attachment security and PTSD symptoms following trauma in adulthood. *Anxiety, Stress, & Coping, 23*, 101–118. doi:10.1080/10615800802638279

*Berant, E., & Pizem, N. (2015). Rescue volunteers’ posttraumatic symptoms, distress, and fear of death: Attachment insecurity moderates. *Death Studies, 39*, 121–127. doi:10.1080/07481187.2014.913087

*Berry, K., Ford, S., Jellicoe-Jones, L., & Haddock, G. (2015). Trauma in relation to psychosis and hospital experiences: The role of past trauma and attachment. *Psychology and Psychotherapy: Theory, Research and Practice, 88*, 227–239. doi:10.1111/papt.12035

*Besser, A., & Neria, Y. (2010). The effects of insecure attachment orientations and perceived social support on posttraumatic stress and depressive symptoms among civilians exposed to the 2009 Israel–Gaza war: A follow-up cross-lagged panel design study. *Journal of Research in Personality, 44*, 335–341. doi:10.1016/j.jrp.2010.03.004

*Besser, A., & Neria, Y. (2012). When home isn’t a safe haven: Insecure attachment orientations, perceived social support, and PTSD symptoms among Israeli evacuees under missile threat. *Psychological Trauma: Theory, Research, Practice, and Policy, 4*, 34–46. doi:10.1037/a0017835

*Besser, A., Neria, Y., & Haynes, M. (2009). Adult attachment, perceived stress, and PTSD among civilians exposed to ongoing terrorist attacks in Southern Israel. *Personality and Individual Differences, 47*, 851–857. doi:10.1016/j.paid.2009.07.003

*Bistricky, S. L., Gallagher, M. W., Roberts, C. M., Ferris, L., Gonzalez, A. J., & Wetterneck, C. T. (2017). Frequency of interpersonal trauma types, avoidant attachment, self-compassion, and interpersonal competence: A model of persisting posttraumatic symptoms. *Journal of Aggression, Maltreatment & Trauma, 26*, 608–625. doi:10.1080/10926771.2017.1322657

*Bogaerts, S., Daalder, A. L., Van Der Knaap, L. M., Kunst, M. J. J. M., & Buschman, J. (2008). Critical incident, adult attachment style, and posttraumatic stress disorder: A comparison of three groups of security workers. *Social Behavior and Personality, 36*, 1063–1072. doi:10.2224/sbp.2008.36.8.1063

*Bogaerts, S., Kunst, M. J. J., & Winkel, F. W. (2009). Dismissive attachment and posttraumatic stress disorder among securely and insecurely attached Belgian security workers. *Psychological Reports, 105*, 889–899. doi:10.2466/PR0.105.3.889-899

*Bosqui, T. J., Marshoud, B., & Shannon, C. (2017). Attachment insecurity, posttraumatic stress, and hostility in adolescents exposed to armed conflict. *Peace and Conflict: Journal of Peace Psychology, 23*, 372–382. doi:10.1037/pac0000260

*Browne, C., & Winkelman, C. (2007). The effect of childhood trauma on later psychological adjustment. *Journal of Interpersonal Violence, 22*, 684–697. doi:10.1177/0886260507300207

*Bryant, R. A., Creamer, M., O’Donnell, M., Forbes, D., Felmingham, K. L., Silove, D., . . . Nickerson, A. (2017). Separation from parents during childhood trauma predicts adult attachment security and post-traumatic stress disorder. *Psychological Medicine, 47*, 2028–2035. doi:10.1017/S0033291717000472

*Busuito, A., Huth-Bocks, A., & Puro, E. (2014). Romantic attachment as a moderator of the association between childhood abuse and posttraumatic stress disorder symptoms. *Journal of Family Violence, 29*, 567–577. doi:10.1007/s10896-014-9611-8

*Clark, A. A., & Owens, G. P. (2012). Attachment, personality characteristics, and posttraumatic stress disorder in U.S. veterans of Iraq and Afghanistan. *Journal of Traumatic Stress, 25*, 657–664. doi:10.1002/jts.2176

*Cohen, E., Dekel, R., & Solomon, Z. (2002). Long-term adjustment and the role of attachment among Holocaust child survivors. *Personality and Individual Differences, 33*, 299–310. doi:10.1016/S0191-8869(01)00156-8

*Currier, J. M., Holland, J. M., & Allen, D. (2012). Attachment and mental health symptoms among U.S. Afghanistan and Iraq veterans seeking health care services. *Journal of Traumatic Stress, 25*, 633–640. doi:10.1002/jts.21752

*Declercq, F., & Palmans, V. (2006). Two subjective factors as moderators between critical incidents and the occurrence of posttraumatic stress disorders: ‘Adult attachment’ and ‘perception of social support.’ *Psychology and Psychotherapy: Theory, Research and Practice, 79*, 323–337. doi:10.1348/147608305X53684

*Declercq, F., & Willemsen, J. (2006). Distress and post-traumatic stress disorders in high risk professionals: Adult attachment style and the dimensions of anxiety and avoidance. *Clinical Psychology and Psychotherapy, 13*, 256–263. doi:10.1002/cpp.492

*Dekel, S., Mandl, C., & Solomon, Z. (2011). Shared and unique predictors of post-traumatic growth and distress. *Journal of Clinical Psychology, 67*, 241–252. doi:10.1002/jclp.20747

*Dekel, R., Solomon, Z., Ginzburg, K., & Neria, Y. (2004). Long-term adjustment among Israeli war veterans: The role of attachment style. *Anxiety, Stress, & Coping, 17*, 141–152. doi:10.1080/1061580041000172118

*Dieperink, M., Leskela, J., Thuras, P., & Engdahl, B. (2001). Attachment style classification and posttraumatic stress disorder in former prisoners of war. *American Journal of Orthopsychiatry, 71*, 374–378. doi:10.1037/0002-9432.71.3.374

*Dutton, D. G., & Painter, S. (1993). Emotional attachments in abusive relationships: A test of traumatic bonding theory. *Violence and Victims, 8*, 105–120.

*Ein-Dor, T., Doron, G., Solomon, Z., Mikulincer, M., & Shaver, P. R. (2010). Together in pain: Attachment-related dyadic processes and posttraumatic stress disorder. *Journal of Counseling Psychology, 57*, 317–327. doi:10.1037/a0019500

*Elklit, A. (2009). Traumatic stress and psychological adjustment in treatment-seeking women sexually abused in childhood: A follow-up. *Scandinavian Journal of Psychology, 50*, 251–257. doi:10.1111/j.1467-9450.2008.00706.x

*Elklit, A. (2015). Treatment of Danish survivors of child sexual abuse—A cohort study. *Behavioral Science, 5*, 589–601. doi:10.3390/bs5040589

*Elklit, A., Christiansen, D. M., Palic, S., Karsberg, S., & Eriksen, S. B. (2014). Impact of traumatic events on posttraumatic stress disorder among Danish survivors of sexual abuse in childhood. *Journal of Child Sexual Abuse, 23*, 918–934. doi:10.1080/10538712.2014.964440

*Elklit, A., Karstoft, K., Lahav, Y., & Andersen, T. E. (2016). Attachment and posttraumatic stress disorder in multiple trauma samples. *Journal of Psychiatry, 19*, 370. doi:10.4172/2378-5756.1000370

*Elwood, L. S., & Williams, N. L. (2007). PTSD-related cognitions and romantic attachment style as moderators of psychological symptoms in victims of interpersonal trauma. *Journal of Social and Clinical Psychology, 26*, 1189–1209. doi:10.1521/jscp.2007.26.10.1189

*Escolas, S. M., Arata-Maiers, R., Hilderbrandt, E. J., Maiers, A. J., Mason, S. T., & Baker, M. M. T. (2012). The impact of attachment style on posttraumatic stress disorder symptoms in postdeployed military members. *U.S. Army Medical Department Journal*. 54–61.[AQ: Please provide volume number for reference “Escolas, S. M., Arata-Maiers, R., Hilderbrandt, E. J., Maiers, A. J., Mason, S. T., & Baker, M. M. T. (2012). The impact of attachment style on posttraumatic stress disorder symptoms in postdeployed military members. U.S. Army Medical Department Journal, 54–61.”]

*Feldman, R., & Vengrober, A. (2011). Posttraumatic stress disorder in infants and young children exposed to war-related trauma. *Journal of the American Academy of Child and Adolescent Psychiatry, 50*, 645–658. doi:10.1016/j.jaac.2011.03.001

*Ferrajão, P. C., & Oliveira, R. A. (2015). Attachment patterns as mediators of the link between combat exposure and posttraumatic symptoms: A study among Portuguese war veterans. *Military Psychology, 27*, 185–195. doi:10.1037/mil0000075

*Ferrajão, P. C., Badoud, D., & Oliveira, R. A. (2017). Mental strategies as mediators of the link between attachment and PTSD. *Psychological trauma: Theory, Research, Practice, and Policy*, *9*, 731–740. doi:10.1037/tra0000251

*Finzi-Dottan, R., Dekel, R., Lavi, T., & Su’ali, T. (2006). Posttraumatic stress disorder reactions among children with learning disabilities exposed to terror attacks. *Comprehensive Psychiatry, 47*, 144–151. doi:10.1016/j.comppsych.2005.05.001

*Forbes, D., Parslow, R., Fletcher, S., McHugh, T., & Creamer, M. (2010). Attachment style in the prediction of recovery following group treatment of combat veterans with post-traumatic stress disorder. *Journal of Nervous and Mental Disease, 12*, 881–884. doi:10.1097/NMD.0b013e3181fe73fa

*Fraley, R. C., Fazzari, D. A., Bonanno, G. A., & Dekel, S. (2006). Attachment and psychological adaptation in high exposure survivors of the September 11th attack on the World Trade Center. *Personality and Social Psychology Bulletin*, *32*, 538–551. doi:10.1177/0146167205282741

*Franz, C. E., Lyons, M. J., Spoon, K. M., Hauger, R. L., Jacobson, K. C., Lohr, J. B., . . . Kremen, W. S. (2014). Post-traumatic stress symptoms and adult attachment: A 24 year longitudinal study. *American Journal of Geriatric Psychology, 22*, 1603–1612. doi:10.1016/j.jagp.2014.02.003

*Frey, L. M., Blackburn, K. M., Werner-Wilson, R. J., Parker, T., & Wood, N. D. (2011). Posttraumatic stress disorder, attachment, and intimate partner violence in a military sample: A preliminary analysis. *Journal of Feminist Family Therapy, 23*, 218–230. doi:10.1080/08952833.2011.604530

*Gallagher, H. C., Richardson, J., Forbes, D., Harms, L., Gibbs, L., Alkemade, N., . . . Bryant, R. A. (2016). Mental health following separation in a disaster: The role of attachment. *Journal of Traumatic Stress, 29*, 56–64. doi:10.1002/jts.22071

*Gallagher, H. C., Lusher, D., Gibbs, L., Pattison, P., Block, K., Harms, L., . . . Bryant, R. A. (2017). Dyadic effects of attachment on mental health: Couples in a postdisaster context. *Journal of Family Psychology, 31*, 192–202. doi:10.1037/fam0000256

*Gao, W., Zhao, J., Li, Y., & Cao, F. (2015). Post-traumatic stress disorder symptoms in first time myocardial infarction patients: Role of attachment and alexithymia. *Journal of Advanced Nursing, 71*, 2575–2584. doi:10.1111/jan.12726

*Ghafoori, B., Hierholzer, R. W., Howsepian, B., & Boardman, A. (2008). The role of adult attachment, parental bonding, and spiritual love in the adjustment to military trauma. *Journal of Trauma and Dissociation, 9*, 85–106. doi:10.1080/15299730802073726

*Goodman, G. S., Olge, C. M., Block, S. D., Harris, L. S., Larson, R. P., Augusti, E., . . . Urquiza, A. (2011). False memory for trauma-related Deese-Roediger-McDermott lists in adolescents and adults with histories of child sexual abuse. *Development and Psychopathology, 23*, 423–438. doi:10.1017/S0954579411000150

*Gore-Felton, C., Ginzburg, K., Chartier, M., Gardner, W., Agnew-Blais, J., McGarvey, E., . . . Koopman, C. (2013). Attachment style and coping in relation to posttraumatic stress disorder symptoms among adults living HIV/AIDS. *Journal of Behavioral Medicine, 36*, 51–60. doi:10.1007/s10865-012-9400-x

*Halpern, J., Maunder, R. G., Schwartz, B., & Gurevich, M. (2011). Attachment insecurity, responses to critical incident distress, and current emotional symptoms in ambulance workers. *Stress and Health, 28*, 51–60. doi:10.1002/smi.1401

*Harari, D., Bakermans-Kranenburg, M. J., de Kloet, C. S., Geuze, E., Vermetten, E., Westenberg, H. G. M., & van Ijzendoorn, M. H. (2009). Attachment representations in Dutch veterans with and without deployment-related PTSD. *Attachment & Human Development, 11*, 515–536. doi:10.1080/14616730903282480

*Haviland, M. G., Sonne, J. L., & Woods, L. R. (1995). Beyond posttraumatic stress disorder: Object relations and reality testing disturbances in physically and sexually abused adolescents. *Journal of American Academy of Child and Adolescent Psychiatry, 34*, 1054–1059. doi:10.1097/00004583-199508000-00015

*Hébert, M., Daspe, M., & Cyr, M. (2018). An analysis of avoidant and approach coping as mediators of the relationship between paternal and maternal attachment security and outcomes in child victims of sexual abuse. *Psychological Trauma: Theory, Research, Practice, and Policy, 10*, 402–410. doi:10.1037/tra0000321

*Horesh, D., Cohen-Zrihen, A., Ein Dor, T., & Solomon, Z. (2014). Stressful life events across the life span and insecure attachment following combat trauma. *Journal of Clinical Social Work, 42*, 375–384. doi:10.1007/s10615-014-0477-2

*Hughes, P. P., Turton, P., Mcgauley, G. A., & Fonagy, P. (2006) Factors that predict infant disorganization in mothers classified as U in pregnancy*. Attachment & Human Development, 8*, 113–122. doi:10.1080/14616730600785660

*Huang, Y. L., Chen, S. H., Su, Y. J., & Kung, Y. W. (2016) Attachment dimensions and posttraumatic symptoms following interpersonal traumas versus impersonal traumas in young adults in Taiwan. *Stress & Health, 33*, 233–243. doi:10.1002/smi.2702

*Itzhaky, L., Stein, J. Y., Levin, Y., & Solomon, Z. (2017). Posttraumatic stress symptoms and marital adjustment among Israeli combat veterans: The role of loneliness and attachment. *Psychological Trauma, 9*, 655–662. doi:10.1037/tra0000259

*Joubert, D., Webster, L., & Hackett, R. K. (2012). Unresolved attachment status and trauma-related symptomatology in maltreated adolescents: An examination of cognitive mediators. *Child Psychiatry and Human Development, 43*, 471–483. doi:10.1007/s10578-011-0276-8

*Kanninen, K., Punamäki, R. L., & Qouta, S. (2003). Personality and trauma: Adult attachment and posttraumatic distress among former political prisoners. *Peace and Conflict: Journal of Peace Psychology, 9*, 97–126. doi:10.1207/S15327949PAC0902_01

*Karatzias, T., Shevlin, M., Hyland, P., Brewin, C. R., Cloitre, M., Bradley, A., . . . Roberts, N. P. (2018). The role of negative cognitions, emotion regulation strategies, and attachment style in complex post-traumatic stress disorder: Implications for new and existing therapies. *British Journal of Clinical Psychology, 57*, 177–185. doi:10.1111/bjc.12172

*Kelly, A., & Garland, E. L. (2016). Trauma-informed mindfulness-based stress reduction for female survivors of interpersonal violence: Results from a stage I RCT. *Journal of Clinical Psychology, 72*, 311–328. doi:10.1002/jclp.22273

*Kindermann, D., Schmid, C., Derreza-Greeven, C., Huhn, D., Kohl, R. M., Junne, F., . . . Nikendei, C. (2017). Prevalence of and risk factors for secondary traumatization in interpreters for refugees: A cross-sectional study. *Psychopathology, 50*, 262–272. doi:10.1159/000477670

*La Flair, L. N., Bradshaw, C. P., Mendelson, T., & Campbell, J. (2015). Intimate partner violence and risk of psychiatric symptoms: The moderating role of attachment. *Journal of Family Violence, 30*, 567–577. doi:10.1007/s1089

*Lahav, Y., Kanat-Maymon, Y., & Solomon, Z. (2016). Secondary traumatization and attachment among wives of former POWs: A longitudinal study. *Attachment & Human Development, 18*, 141–153. doi:10.1080/14616734.2015.1121502

*Lam, K. Y. (2015). Disclosure and psychological well-being of sexually abused adolescents in Hong Kong. *Journal of Child Sexual Abuse, 24*, 731–752. doi:10.1080/10538712.2015.1077364

*Lassri, D., Luyten, P., Cohen, G., & Shahar, G. (2016). The effect of childhood emotional maltreatment on romantic relationships in young adulthood: A double mediation model involving self-criticism and attachment. *Psychological Trauma: Theory, Research, Practice, and Policy, 4*, 504–511. doi:10.1037/tra0000134

*Levendosky, A. A., Huth-Bocks, A., & Semel, M. A. (2002). Adolescent peer relationships and mental health functioning in families with domestic violence. *Journal of Clinical Child and Adolescent Psychology, 31*, 206–218. doi:10.1207/S15374424JCCP3102_06

*Lilly, M. M., & Lim, B. H. P. (2013). Shared pathogeneses of posttrauma pathologies: Attachment, emotion regulation, and cognitions. *Journal of Clinical Psychology, 69*, 737–748. doi:10.1002/jclp.21934

*Lim, B. H. P., Adams, L. A., & Lilly, M. M. (2012). Self-worth as a mediator between attachment and posttraumatic stress in interpersonal trauma. *Journal of Interpersonal Violence, 27*, 2039–2061. doi:10.1177/0886260511431440

*London, M. J., Lilly, M. M., & Pittman, L. (2015). Attachment as a mediator between community violence and posttraumatic stress symptoms among adolescents with a history of maltreatment. *Child Abuse and Neglect, 42*, 1–9. doi:10.1016/j.chiabu.2014.11.002

*Macdonald, H. Z., Beeghly, M., Grant-Knight, W., Augustyn, M., Woods, R. W., Carbral, H., . . . Frank, D. A. (2008). Longitudinal association between infant disorganized attachment and childhood posttraumatic stress symptoms. *Development and Psychopathology, 20*, 493–508. doi:10.1017/S0954579408000242

*Marmaras, E., Lee, S. S., Siegel, H., & Reich, W. (2003). The relationship between attachment styles and vicarious traumatization in female trauma therapists. *Journal of Prevention & Intervention in the Community, 26*, 81–92. doi:10.1300/J005v26n01 07

*Mikulincer, M., Ein-Dor, T., Solomon, Z., & Shaver, P. R. (2011). Trajectories of attachment insecurities over a 17-year period: A latent growth curve analysis of the impact of war captivity and posttraumatic stress disorder. *Journal of Social and Clinical Psychology, 30*, 960–984. doi:10.1521/jscp.2011.30.9.960

*Mikulincer, M., Florian, V., & Weller, A. (1993). Attachment styles, coping strategies, and posttraumatic psychological distress: The impact of the Gulf War in Israel. *Journal of Personality and Social Psychology, 64*, 817–826. doi:10.1037/0022-3514.64.5.817

*Mikulincer, M., Horesh, N., Eilati, I., & Kotler, M. (1999). The association between adult attachment style and mental health in extreme life-endangering conditions. *Personality and Individual Differences, 27*, 831–842. doi:10.1016/S0191-8869(99)00032-X

*Muller, R. T., & Lemieux, K. E. (2000). Social support, attachment, and psychopathology in high risk formerly maltreated adults. *Child Abuse & Neglect, 24*, 883–900. doi:10.1016/S0145-2134(00)00150-2

*Muller, R. T., & Rosenkranz, S. E., (2009). Attachment and treatment response among adults in inpatient treatment for Posttraumatic Stress Disorder. *Psychotherapy Theory, Research, Practice, Training, 46*, 82–96. doi:10.1037/a0015137

*Muller, R. T., Sicoli, L. A., & Lemieux, K. E. (2000). Relationship between attachment style and posttraumatic stress symptomatology among adults who report the experience of childhood abuse. *Journal of Traumatic Stress, 13*, 321–332. doi:10.1023/A:1007752719557

*Murphy, S., Elklit, A., Hyland, P., & Shevlin, M. (2016). Insecure attachment orientations and posttraumatic stress in a female treatment-seeking sample of survivors of childhood sexual abuse: A cross-lagged panel study. *Traumatology, 22*, 48–55. doi:10.1037/trm0000060

*Nye, E. C., Katzman, J., Bell, J. B., Kilpatrick, J., Brainard, M., & Haaland, K. Y. (2008). Attachment organization in Vietnam combat veterans with posttraumatic stress disorder. *Attachment and Human Development, 10*, 41–57. doi:10.1080/14616730701868613

*O’Connor, M., & Elklit, A. (2008). Attachment styles, traumatic events, and PTSD: A cross-sectional investigation of adult attachment and trauma. *Attachment & Human Development, 10*, 59–71. doi:10.1080/14616730701868597

*Ogle, C. M., Rubin, D. C., & Siegler, I. C. (2015). The relation between insecure attachment and posttraumatic stress: Early life versus adulthood traumas. *Psychological Trauma: Theory, Research, Practice, and Policy, 7*, 324–332. doi:10.1037/tra0000015

*Ogle, C. M., Rubin, D. C., & Siegler, I. C. (2016a). Accounting for posttraumatic stress disorder symptom severity with pre- and posttrauma measures: A longitudinal study of older adults. *Clinical Psychological Science, 4*, 272–286. doi:10.1177/2167702615583227

*Ogle, C. M., Rubin, D. C., & Siegler, I. C. (2016b). Maladaptive trauma appraisals mediate the relation between attachment anxiety and PTSD symptom severity. *Psychological Trauma, 8*, 301–309. doi:10.1037/tra0000112

*Okello, J., Nakimuli-Mpungu, E., Musisi, S., Broekaert, E., & Derluyn, I. (2014). The association between attachment and mental health symptoms among school-going adolescents in Northern Uganda: The moderating role of war-related trauma. *PLoS One, 9*, e88494. doi:10.1371/journal.pone.0088494

*Ortigo, K. M., Westen, D., DeFife, J. A., & Bradley, B. (2013). Attachment, social cognition, and posttraumatic stress symptoms in a traumatized, urban population: Evidence for the mediating role of object relations. *Journal of Traumatic Stress, 26*, 361–368. doi:10.1002/jts.21815

*Overbeek, M. M., de Schipper, J. C., Lamers-Winkelman, F., & Schuengel, C. (2014). Risk factors as moderators of recovery during and after interventions for children exposed to interparental violence. *American Journal of Orthopsychiatry, 84*, 295–306. doi:10.1037/ort0000007

*Owens, G. P. (2016). Predictors of posttraumatic growth and posttraumatic stress symptom severity in undergraduates reporting potentially traumatic events. *Journal of Clinical Psychology, 72*, 1064–1076. doi:10.1002/jclp.22309

*Owens, G. P., Held, P., Blackburn, L., Auerbach, J. S., Clark, A. A., Herrera, C. J., . . . Stuart, G. L. (2014). Differences in relationship conflict, attachment, and depression in treatment-seeking veterans with hazardous substance use, PTSD, or PTSD and hazardous substance use. *Journal of Interpersonal Violence, 29*, 1318–1337. doi:10.1177/0886260513506274

*Palosaari, E., Punamaki, R., Qouta, S., & Diab, M. (2013). Intergenerational effects of war trauma among Palestinian families mediated via psychological maltreatment. *Child Abuse & Neglect, 37*, 955–968. doi:10.1016/j.chiabu.2013.04.006

*Picken, A. L., Berry, K., Tarrier, N., & Barrowclough, C. (2010). Traumatic events, posttraumatic stress disorder, attachment style, and working alliance in a sample of people with psychosis. *Journal of Nervous and Mental Disease, 198*, 775–778. doi:10.1097/NMD.0b013e3181f4b163

*Pietrzak, R. H., & Cook, J. M. (2013). Psychological resilience in older U.S. veterans: Results from the national health and resilience in veterans study. *Depression and Anxiety, 30*, 432–443. doi:10.1002/da.22083

*Pow, A. M., & Cashwell, C. S. (2017). Posttraumatic stress disorder and emotion-focused coping among disaster mental health counselors. *Journal of Counseling and Development, 95*, 322–331. doi:10.1002/jcad.12146

*Powers, A., Fani, N., Carter, S., Cross, D., Cloitre, M., & Bradley, B. (2017). Differential predictors of DSM-5 PTSD and ICD-11 complex PTSD among African American women. *European Journal of Psychotraumatology, 8*, 1338914. doi:10.1080/20008198.2017.1338914

*Punamaki, R., Qouta, S., & Peltonen, K. (2017). Family systems approach to attachment relations, war trauma, and mental health among Palestinian children and parents. *European Journal of Psychotraumatology, 8*, 1439649. doi:10.1080/20008198.2018.1439649

*Renaud, E. F. (2008). The attachment characteristics of combat veterans with PTSD. *Traumatology, 14*, 2–12. doi:10.1177/1534765608319085

*Riber, K. (2016) Attachment organization in Arabic-speaking refugees with Posttraumatic Stress Disorder. *Attachment & Human Development, 18*, 154–175. doi:10.1080/14616734.2015.1124442

*Riggs, S. A., Paulson, A., Tunnell, E., Sahl, G., Atkison, H., & Ross, C. A. (2007a). Attachment, personality, and psychopathology among adult inpatients: Self-reported romantic attachment style versus Adult Attachment Interview states of mind. *Development and Psychopathology, 19*, 263–291. doi:10.10170S0954579407070149

*Riggs, S. A., Sahl, G., Greenwald, E., Atkinson, H., Paulson, A., & Ross, C. A. (2007b). Family environment and adult attachment as predictors of psychopathology and personality dysfunction among inpatient abuse survivors. *Violence and Victims, 5*, 577–598. doi:10.1891/088667007782312159

*Rosario, N., Salzinger, S., Feldman, R. S., & Ng-Mak, D. S. (2008). Intervening processes between youths’ exposure to community violence and internalizing symptoms over time: The roles of social support and coping. *American Journal of Community Psychology, 41*, 43–62. doi:10.1007/s10464-007-9147-7

*Ruhlmann, L. M., Gallus, K. L., & Durtschi, J. A. (2018). Exploring relationship satisfaction and attachment behaviors in single- and dual-trauma couples: A pilot study. *Traumatology, 24*, 27–35. doi:10.1037/trm0000129

*Sandberg, D. A. (2010). Adult attachment as a predictor of posttraumatic stress and dissociation. *Journal of Trauma & Dissociation, 11*, 293–307. doi:10.1080/15299731003780937

*Sandberg, D. A., Suess, E. A., & Heaton, J. L. (2010). Attachment anxiety as a mediator of the relationship between interpersonal trauma and posttraumatic symptomatology among college women. *Journal of Interpersonal Violence, 25*, 33–49. doi:10.1177/0886260508329126

*Santa-Maria, M. L., & Cornille, T. (2007). Traumatic stress, family separations, and attachment among Latin American immigrants. *Traumatology, 13*, 26–31. doi:10.1177/1534765607302278

*Sautter, F. J., Glynn, S. M., Cretu, J. B., Senturk, D., & Vaught, A. S. (2015). Efficacy of structured approach therapy in reducing PTSD in returning veterans: A randomized clinical trial. *Psychological Services, 12*, 199–212. doi:10.1037/ser0000032

*Schechter, D. S., Moser, D. A., Pointet, V. C., Aue, T., Stenz, L., Paoloni-Giacobino, A., . . . Dayer, A. G. (2017). The association of serotonin receptor 3A methylation with maternal violence exposure, neural activity, and child aggression. *Behavioral Brain Research, 325*, 268–277. doi:10.1016/j.bbr.2016.10.009

*Scheidt, C. E., Hasenburg, A., Kunze, M., Waller, E., Pfeifer, R., Zimmermann, P., . . . Waller, N. (2012). Are individual differences of attachment predicting bereavement out-come after perinatal loss? A prospective cohort study. *Journal of Psychosomatic Research, 73*, 375–382. doi:10.1016/j.jpsychores.2012.08.017

*Schierholz, A., Krüger, A., Barenbrügge, J., & Ehring, T. (2016). What mediates the link between childhood maltreatment and depression? The role of emotion dysregulation, attachment, and attributional style. *European Journal of Psychotraumatology, 7*, 32652. doi:10.3402/ejpt.v7.32652

*Scott, S., & Babcock, J. (2009). Attachment as a moderator between intimate partner violence and PTSD symptoms. *Journal of Family Violence, 25*, 1–9. doi:10.1007/s10896-009-9264-1

*Shallcross, S. L., Frazier, P., & Anders, S. L. (2014). Social resources mediate the relations between attachment dimensions and distress following potentially traumatic events. *Journal of Counseling Psychology, 3*, 352–362. doi:10.1037/a0036583

*Shura, R. D., Rutherford, B. J., Fugett, A., & Lindberg, M. A. (2017). An exploratory study of attachments and posttraumatic stress in combat veterans. *Current Psychology, 36*, 110–118. doi:10.1007/s12144-015-9390-2

*Sippel, L. M., Han, S., Watkins, L. E., Harpaz-Rotem, I., Southwick, S. M., Krystal, J. H., . . . Pietrzak, R. H. (2017). Oxytocin receptor gene polymorphisms, attachment, and PTSD: Results from the National Health and Resilience in Veterans Study. *Journal of Psychiatry Research*, *94*, 139–147. doi:10.1016/j.jpsychires.2017.07.008

*Smith, L. S., & Stover, C. S. (2016). The moderating role of attachment on the relationship between history of trauma and intimate partner violence victimization. *Violence Against Women, 22*, 745–764. doi:10.1177/1077801215610863

Solomon, Z., Benbenishty, R., Neria, Y., Abramowitz, M., Ginzburg, K., & Ohry, A. (1993). Assessment of PTSD: Validation of the revised PTSD Inventory. *The Israel Journal of Psychiatry and Related Science, 30*, 110–115.

*Solomon, Z., Dekel, R., & Mikulincer, M. (2008). Complex trauma of war captivity: A prospective study of attachment and post-traumatic stress disorder. *Psychological Medicine, 38*, 1427–1434. doi:10.1017/S0033291708002808

*Solomon, Z., Ginzburg, K., Mikulincer, M., Neria, Y., & Ohry, A. (1998). Coping with war captivity: The role of attachment style. *European Journal of Personality, 12*, 271–285. doi:10.1002/(SICI)1099-0984

*Stalker, C. A., Gebotys, R., & Harper, K. (2005). Insecure attachment as a predictor of outcome following inpatient trauma treatment for women survivors of child abuse. *The Bulletin of the Menninger Clinic, 69*, 137–156. doi:10.1521/bumc.69.2.137.66508

*Stovall-McClough, K. C., & Cloitre, M. (2003). Reorganization of unresolved childhood traumatic memories following exposure therapy. *Annals New York Academy of Sciences, 1008*, 297–299. doi:10.1196/annals.1301.036

*Stovall-McClough, K. C., & Cloitre, M. (2006). Unresolved attachment, PTSD, and dissociation in childhood abuse histories. *Journal of Consulting and Clinical Psychology, 74*, 219–228. doi:10.1037/0022-006X.74.2.219

*Tamman, A. J. F., Sippel, L. M., Han, S., Neria, Y., Krystal, J. H., Southwick, S. M., . . . Pietrzak, R. H. (2017). Attachment style moderates effects of FKBP5 polymorphisms and childhood abuse on post-traumatic stress symptoms: Results from the National Health and Resilience in Veterans Study. *The World Journal of Biological Psychiatry, 5*, 1–12. doi:080/15622975.2017.1376114

*Tavakoli, S., Chen, M. W., Zook, N., & Bethea, S. (2015). Attachment, combat exposure, and post-trauma cognitions as predictors of PTSD and PTG in veterans. *Journal of Military and Government Counseling, 3*, 113–130.

*Tosone, C., McTighe, J. P., & Bauwens, J. (2015). Shared traumatic stress among social workers in the aftermath of Hurricane Katrina. *British Journal of Social Work, 45*, 1313–1329. doi:10.1093/bjsw/bct194

*Tosone, C., McTighe, J. P., Bauwens, J., & Naturale, A. (2011). Shared traumatic stress and the long-term impact of 9/11 on Manhattan clinicians. *Journal of Traumatic Stress, 24*, 546–552. doi:10.1002/jts.20686

*Turunen, T., Haravuori, H., Punamaki, R., Suomalainen, L., & Marttunen, M. (2014). The role of attachment in recovery after a school-shooting trauma. *European Journal of Psychotraumatology, 5*, 22728. doi:10.3402/ejpt.v5.22728

*Van der Hal-van Raalte, E., Van Ijzendoorn, M. H., & Bakermans-Kranenburg, M. J. (2007). Quality of care after early childhood trauma and well-being in later life: Child Holocaust survivors reaching old age. *American Journal of Orthopsychiatry, 77*, 514–522. doi:10.1037/0002-9432.77.4.514

*Van Dijke, A., Hopman, J. A. B., & Ford, J. D. (2018). Affect dysregulation, psychoform dissociation, and adult relational fears mediate the relationship between childhood trauma and complex posttraumatic stress disorder independent of the symptoms of borderline personality disorder. *European Journal of Psychotraumatology, 9*, 1400878. doi:10.1080/20008198.2017.1400878

*Venta, A., Hatkevich, C., Mellick, W., Vanwoerden, S., & Sharp, C. (2017). Social cognitive mediates the relation between attachment schemas and posttraumatic stress disorder. *Psychological Trauma: Theory, Research, Practice, and Policy, 9*, 88–95. doi:10.1037/tra0000165

*Volgin, R., & Bates, G. (2016). Attachment and social support as predictors of posttraumatic stress and posttraumatic growth. *Traumatology, 22*, 184–191. doi:10.1037/trm0000083

*Waldman-Levi, A., Finzi-Dottan, R., & Weintraub, N. (2015). Attachment security and parental perception of competency among abused women in the shadow of PTSD and childhood exposure to domestic violence. *Journal of Child and Family Studies, 24*, 57–65. doi:10.1007/s10826-013-9813-3

*Waugh, M. J., Robbins, I., Davies, S., & Feigenbaum, J. (2007). The long-term impact of war experiences and evacuation on people who were children during World War Two. *Aging and Mental Health, 11*, 168–174. doi:10.1080/13607860600844473

*Woodward, M. J., Patton, S. C., Olsen, S. A., Jones, J. M., Reich, C. M., . . . Beck, J. G. (2013). How do attachment style and social support contribute to women’s psychopathology following intimate partner violence? Examining clinician ratings versus self-report. *Journal of Anxiety Disorders, 3*, 312–320. doi:10.1016/j.janxdis.2013.02.007

*Zakin, G., Solomon, Z., & Neria, Y. (2003). Hardiness, attachment style, and long term psychological distress among Israeli POWs and combat veterans. *Personality and Individual Differences, 34*, 819–829. doi:10.1016/S0191-8869(02)00073-9

*Zerach, G., Greene, T., & Solomon, Z. (2015). Secondary traumatization and marital adjustment among former prisoners of war wives. *Journal of Loss and Trauma, 20*, 336–353. doi:10.1080/15325024.2014.885270

*Zerach, G., & Solomon, Z. (2016). A relational model for the intergenerational transmission of captivity trauma: A 23-year longitudinal study. *Psychiatry, 79*, 297–316. doi:10.1080/00332747.2016.1142775

*Zerach, G., & Tam, E. (2016). The relationships between family functioning and attachment orientations to post-traumatic stress symptoms among young adults who were evacuated from Gaza Strip settlements as adolescents. *Anxiety, Stress, & Coping, 29*, 153–172. doi:10.1080/10615806.2015.1014998
